# Supplementary material
Source: PubMed Central journal article supplement (PMC7641983)

<0.001

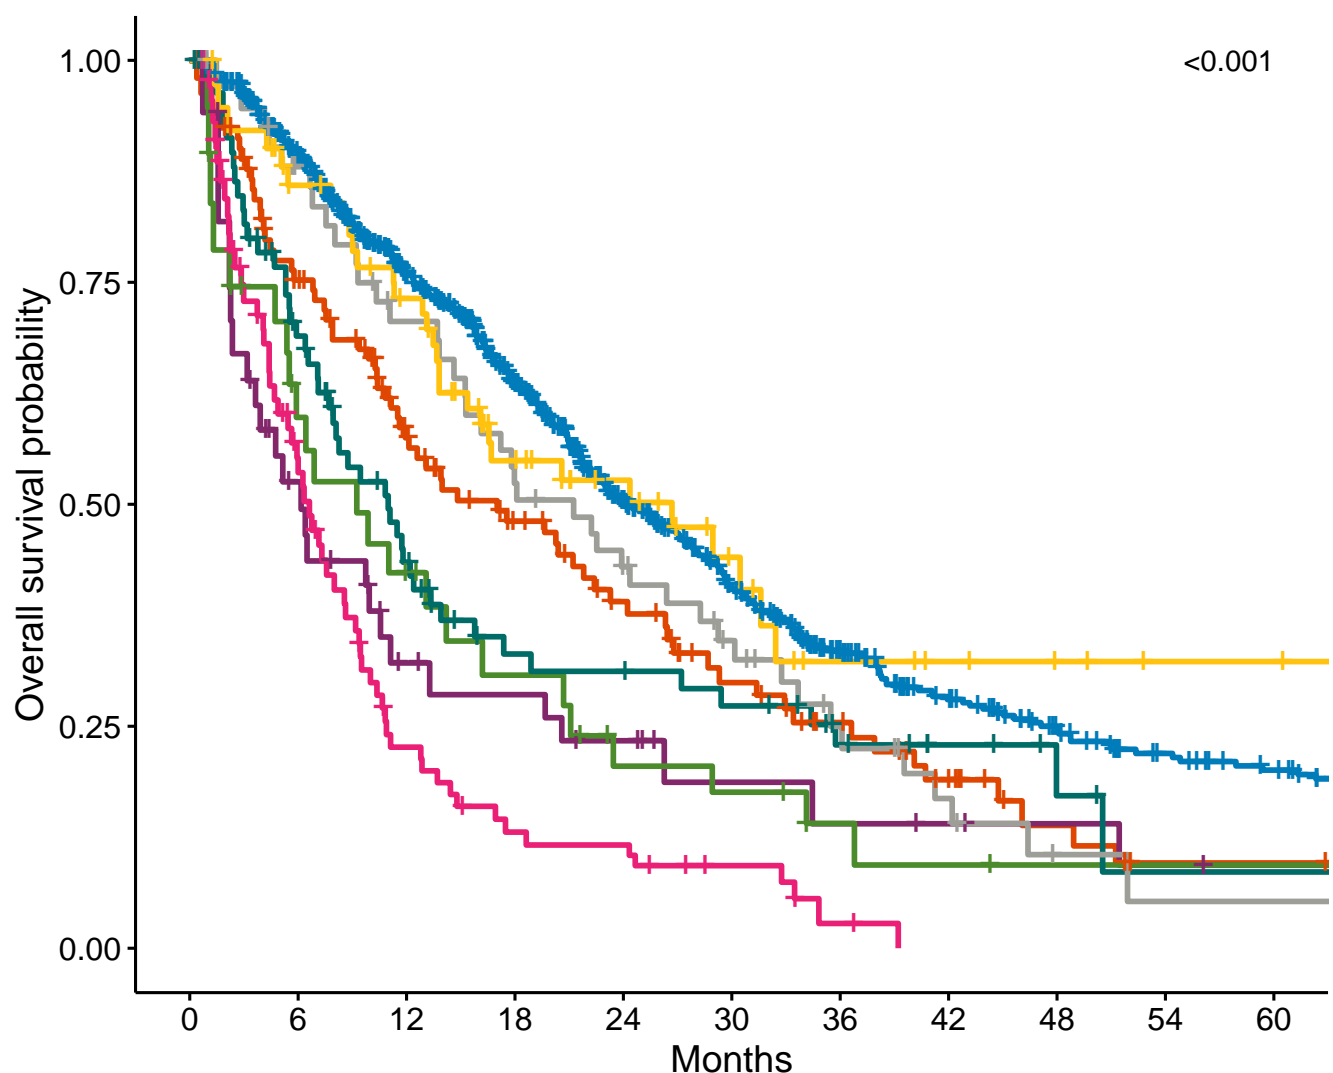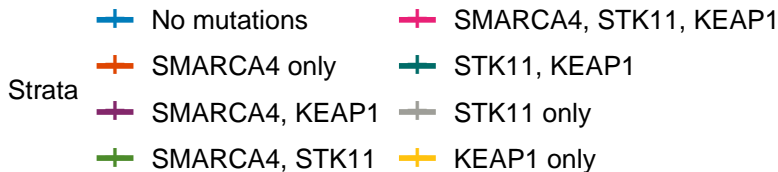

Supplement: NIHMS1615178-supplement-2.pdf [file NIHMS1615178-supplement-2.pdf]
